# Supplementary material for: First Observation of Mercury Species on an Important Water Vapor Channel in the Southeast Tibetan Plateau
Source: Copernicus journal article supplement (doi:10.5194/acp-2021-357), 2021-09-27
Supplement: Supplementary file [file acp-2021-357-AC1-supplement.pdf]

1 **Responses to the Reviewers' Comments**

2 **First Observation of Mercury Species on an Important Water Vapor Channel in the**  
3 **Southeast Tibetan Plateau**

4  
5 Dear editor and reviewer,

6 We greatly appreciate the useful comments and suggestions from the editor and reviewers. We  
7 think the novelty and importance of this study have been acknowledged by the reviewers. We have  
8 revised the manuscript thoroughly based on the reviewers' comments. Detailed point by point  
9 responses are provided below. All the revisions have been highlighted in blue in the revised  
10 manuscript. We hope the revised manuscript could meet the standard of ACP. Thanks again for your  
11 consideration.

12  
13 **Anonymous Referee #2**

14 The manuscript entitled 'First Observation of Mercury Species on an Important 2 Water Vapor  
15 Channel in the Southeast Tibetan Plateau' by Line et al. presents ~5 months of speciated mercury  
16 concentrations (using online and offline sampling) at Nyingchi during the period preceding and  
17 during the Indian Summer Monsoon (ISM). This site is located in an important water vapor  
18 channel and thus is ideal for investigating the transport of pollution to the Tibetan Plateau. The  
19 authors divide the ISM into three periods, then use back trajectory clustering analysis and principal  
20 component analysis to investigate the sources and source regions affecting mercury concentrations.  
21 The authors found the PISM periods to be affected by westerly circulation with higher levels of  
22 GEM, a distinct diurnal pattern, with long-range transport and local emissions being important  
23 factors. While the ISM period was affected by transport from the Bay of Bengal and the Indian  
24 Ocean, with lower levels of all mercury species, a different diurnal pattern compared to PISM, and  
25 local emissions, meteorology, and snowmelt. They concluded wet deposition and uptake by  
26 vegetation to be responsible for the low concentrations observed during the ISM. This manuscript  
27 presents the first results from this location and coupled with their previous study from Qomolangma  
28 Natural Nature Preserve present an important analysis of pollution entering the Tibetan Plateau.  
29 However, there are points where the manuscript could be improved. Their interpretation is sound  
30 although requires more discussion. While the manuscript is readable, there are improvements to the  
31 language that would aid in the readability. Overall, I recommend the publication of this manuscript  
32 after addressing the major revisions outlined below.

33 **Response:**

34 Thanks for your detailed comments and suggestions. We have polished the language of the  
35 manuscript, updated the cited references, extended the discussion and revised the figure location  
36 accordingly. Please see the revised manuscript. All the revisions have been highlighted in blue.  
37 Detailed responses to your comments are provided as follows.

38  
39 **General Comments**

40 **Comment #1**

41 It is important to make a distinction between which species of mercury the authors are referring to  
42 in a specific context. Often ‘Hg concentrations’ are stated when it isn’t completely clear which  
43 species (GEM, GOM, or PBM) or which measurement technique (Tekran vs passive samplers) is  
44 being referred to in that context.

45 **Response #1**

46 Thanks for the suggestion. We carefully reviewed the article in relation to “Hg concentrations” and  
47 We have carefully polished the language of the manuscript. Given the relatively low accuracy of the  
48 data obtained using passive sampling monitoring, they were used only in a very small part of the  
49 paper, while the data of concentrations mainly came from Tekran.

50

51 **Comment #2**

52 Throughout the text, the authors write ‘under the control of’ or ‘control period’ when referring to  
53 transport/circulation patterns. While this is understandable after several readings and sometime  
54 thinking about the meaning, this phrasing can be reworded to be more concise and readable. This  
55 would go a long way to improving the ease of readability of this manuscript.

56 **Response #2**

57 Thanks for the suggestion. We are sorry for the inaccuracies and thank the reviewer for your patience.  
58 We have reviewed the description of the atmospheric circulation factors in the article and tried our  
59 best to improve the ease of readability of the manuscript. All the revisions have been highlighted in  
60 blue in the revised manuscript.

61

62 **Comment #3**

63 The authors make a great effort to characterize the sources and transport patterns of GEM using  
64 clustering of back trajectories and PSCF. However, I was quite perplexed to find that no effort had  
65 been made to couple back trajectories to GOM or PBM concentrations.

66 **Response #3**

67 Thanks for the suggestion. In this manuscript, we carried out trajectory analysis for GEM.  
68 Considering the complex topography of the Tibetan Plateau and the fact that most of the trajectories  
69 pass through the YZB Grand Canyon, where the subsidence of GOM/PBM is very complex, we  
70 think that backward trajectory simulations of GOM and PBM at Nyingchi may introduce  
71 considerable errors and uncertainties.

72

73 **Comment #4**

74 The GEM passive samplers data are presented although discussed only briefly. This is an  
75 underutilized dataset in this manuscript, the large variations in the data warrant further analysis.

76 **Response #4**

77 Thanks for the suggestion. We have extended the discussion of GEM passive sampling data in the  
78 revised manuscript. In section 3.1, we added seasonal variation information to the plots of passive

79 sampling data, and added discussions on GEM seasonal variation. The added text is: **‘In terms of**  
80 **seasonal variation, average GEM concentrations were the lowest in summer ( $1.03\pm 0.09$  ng m<sup>-3</sup>),**  
81 **with almost identical average concentrations in spring, autumn and winter ( $1.14\pm 0.28$  ng**  
82 **m<sup>-3</sup>,  $1.16\pm 0.35$  ng m<sup>-3</sup> and  $1.14\pm 0.28$  ng m<sup>-3</sup>, respectively). This is in contrast to the trends in**  
83 **the surrounding areas, where the highest GEM concentrations in Nam co, Mt. Ailao, Mt.**  
84 **Waliguan and Mt. Gongga (Yin et al., 2018; Zhang et al., 2016; Fu et al., 2012; Fu et al., 2008)**  
85 **were all found in summer, which may indicate that the Indian summer winds that bring high**  
86 **summer GEM concentrations to these areas do not present similar effect on the SET region.’**  
87 We have also calculated the trajectories for the entire passive sampling period and added discussions  
88 of the sources of trajectories for different seasons, as well as discussions of the trajectories for the  
89 higher and lower monitored concentrations in the passive sampling period in section 3.3. The added  
90 text is: **‘We also calculated backward trajectories for the passive sampler monitoring period.**  
91 **Figure S4 shows the trajectories of air masses arriving at the SET station in different seasons.**  
92 **Due to the low accuracy of the data obtained from passive sampling, we didn’t combine the**  
93 **GEM concentrations from the passive sampler monitoring with the trajectories here. Except**  
94 **for winter, the vast majority of trajectories originated from the south of the SET station, and**  
95 **most of the trajectories are short in distance. This may be related to the complex local**  
96 **topography, which may also suggest that long-distance transport has limited effect on SET**  
97 **station. There is a partial shift of the backward trajectory from the southwest to the south in**  
98 **spring, compared to summer, which may originate mainly from the influence of the Indian**  
99 **monsoon. The abundance of precipitation, halogens from the Indian monsoon, and rapid**  
100 **growth of vegetation during the monsoon period may have depleted Hg species, and resulted**  
101 **in the lower GEM concentrations in summer. Trajectories from the northern branch of the**  
102 **westerly circulation were more abundant in autumn compared to winter, but did not appear**  
103 **to have an impact on local mean GEM concentrations. Because of the large concentration**  
104 **variations in the passive sampling monitoring, we aggregated the trajectories for the periods**  
105 **of high concentrations (GEM concentrations above  $1.5$  ng m<sup>-3</sup>) and low concentrations (GEM**  
106 **concentrations below  $1.0$  ng m<sup>-3</sup>) and performed a cluster analysis. The majority of trajectories**  
107 **in both categories were from the southern part of the SET station and were of similar length**  
108 **(Figure S5), which indicates that the differences in concentrations monitored by passive**  
109 **sampling may not be related to external transport.’**

#### 111 **Comment #5**

112 The results of the PCA analysis, at least to me, indicate that long-range transport is the dominant  
113 source of GEM while local emissions are more important for GOM and PBM. This is a key result  
114 from this study which is listed and mentioned briefly. The author proposes yak dung to be an  
115 important local source yet only speculate and do not provide any references that show this could be  
116 a source of GOM or PBM. A similar comment for the snowmelt factor, during ISM1, snowmelt is a  
117 source of GEM and GOM. From Fig. 2, it appears this factor could be occurring only during a short

118 period (the large spike in GEM and GOM at the end of ISM1), which could be investigated in more  
119 detail (e.g., was there snow on the ground during this time, what was the wind direction, temperature,  
120 RH, solar radiation during this time?). Expanding on the PCA analysis could give more insight into  
121 the local sources of Hg species at Nyingchi.

#### 122 **Response #5**

123 Thanks for the suggestion. We have expanded the PCA analysis at the end of section 3.4. The added  
124 text is: **‘The PCA results provide some new insights into the sources of Hg species. During  
125 active monitoring period, long-distance transport of GEM was the main source of SET station  
126 and only occurred at PISM and ISM3. Given the low GEM concentrations in ISM1 and ISM2,  
127 it is reasonable that PISM and ISM3 are the main long-distance transport periods for GEM.  
128 For GOM and PBM, on the other hand, local sources appear to be more important during  
129 active monitoring period. This may be related to the fact that GOM and PBM deposit more  
130 easily and have complex transport paths to the SET station. The local sources of GOM and  
131 PBM are inconclusive. The concentrations of GOM and PBM monitored at the SET station  
132 are not high and the local emissions can be assumed to be small. They might come from yak  
133 dung burning or other local sources by the local residents (Rhode et al., 2007; Xiao et al., 2015;  
134 Chen et al., 2015), or the strong solar radiation and snow surface reaction, which need to be  
135 confirmed by further field experimental studies.’**

136 To the best of our knowledge, there is no data in literature on the species mercury emission of yak  
137 dung burning. However, yak dung is a biomass, a metabolic product of yak grazing, and therefore  
138 it can be assumed that burning yak dung is similar to burning biomass. Biomass burning is widely  
139 recognized a source of atmospheric GOM and PBM (De Simone et al., 2015; De Simone et al.,  
140 2016), thus GOM and PBM might also be released during the burning of yak dung.

141 Regarding the large spike in GOM at the end of ISM1, we have added a discussion at the end of  
142 section 3.1. The added text is: **‘Table S3 shows the variations of Hg species, meteorological  
143 factors and other pollutants from June 1 to 4, 2019. High GOM concentrations were observed  
144 on June 2 and 3, and very high solar radiation and UV Index were also observed in these days.  
145 PBM concentrations, relative humidity and O<sub>3</sub> were low during this period. The solar  
146 radiation was nearly twice the mean value of the ISM1 phase (162.79 W m<sup>-2</sup>, Table S2), and  
147 thus higher solar radiation might contribute to the higher GOM concentrations. PBM might  
148 be partly converted to GOM, but the decrease in PBM concentration was less than the increase  
149 in GOM concentration. Generally, high O<sub>3</sub> concentrations should be observed at high solar  
150 radiation (Kondratyev et al., 1996), but low O<sub>3</sub> concentrations were found at Nyingchi,  
151 suggesting that O<sub>3</sub> may be involved in the formation of GOM. The oxidation of GEM by OH  
152 and O<sub>3</sub> to generate GOM has been discussed in previous studies with model simulation  
153 (Sillman et al., 2007), which may explain the reduced concentration of O<sub>3</sub>, while OH radicals  
154 may be associated with high solar radiation. The mechanism of GOM formation should be  
155 further explored in future studies.’**

156

157 **Comment #6**

158 One practical note, please follow ACPs guidelines on the placement of figures and figure captions  
159 ‘Figures and tables as well as their captions must be inserted in the main text near the location of  
160 the first mention (not appended to the end of the manuscript).’. It wasn’t practical to change between  
161 text and figures, especially when the captions were also in a different location. Also, please put a  
162 line between references in the bibliography, it was quite difficult to find a certain reference when  
163 they are all bunched together. The references need to be properly formatted as well.

164 **Response #6**

165 Thanks for the suggestions. Revisions have been made accordingly.

166

167 **Specific Comments**

168 **Comment #7**

169 Line 29: I feel there is a better word than ‘infected’ which can be used here. Possibly ‘influenced’.

170 **Response #7**

171 We have replaced the word accordingly. Thanks for the suggestion.

172

173 **Comment #8**

174 Lines 33-36: The authors separate the ISM into three periods but list an average for the entire ISM.  
175 Maybe it could be beneficial to list averages for all three periods or list the periods in descending  
176 order? There is also significant overlap between the standard deviations for parameters between  
177 periods. Have the authors performed any statistical tests like a t-test or Wilcoxon Rank Sum test to  
178 test for significant differences?

179 **Response #8**

180 We have added data on Hg species concentrations for different ISM stages in section 3.1. We didn’t  
181 add it to the Abstract because it would make the Abstract too long. The GEM and PBM  
182 concentrations during the preceding Indian summer monsoon (PISM) period ( $1.20 \pm 0.35 \text{ ng m}^{-3}$ , and  
183  $11.4 \pm 4.8 \text{ pg m}^{-3}$  for GEM, and PBM, respectively) were significantly higher than those during the  
184 ISM period ( $0.95 \pm 0.21 \text{ ng m}^{-3}$ , and  $8.8 \pm 6.0 \text{ pg m}^{-3}$ ). The GOM concentration during the PISM  
185 period ( $13.5 \pm 7.3 \text{ pg m}^{-3}$ ) was almost at the same level with that during the ISM period ( $12.7 \pm 14.3$   
186  $\text{pg m}^{-3}$ ).

187 The added text in the Abstract is: ‘**The GEM and PBM concentrations during the preceding**  
188 **Indian summer monsoon (PISM) period ( $1.20 \pm 0.35 \text{ ng m}^{-3}$ , and  $11.4 \pm 4.8 \text{ pg m}^{-3}$  for GEM and**  
189 **PBM, respectively) were significantly higher than those during the ISM period ( $0.95 \pm 0.21 \text{ ng}$   
190  **$\text{m}^{-3}$ , and  $8.8 \pm 6.0 \text{ pg m}^{-3}$ ). The GOM concentration during the PISM period ( $13.5 \pm 7.3 \text{ pg m}^{-3}$ )**  
191 **was almost at the same level with that during the ISM period ( $12.7 \pm 14.3 \text{ pg m}^{-3}$ ).’****

192 The added text in section 3.1 is: ‘**From ISM1 to ISM3, the average GEM concentrations**  
193 **increased from  $0.92 \pm 0.23 \text{ ng m}^{-3}$ ,  $0.92 \pm 0.18 \text{ ng m}^{-3}$  to  $1.04 \pm 0.21 \text{ ng m}^{-3}$ , while GOM**  
194 **concentrations decreased sharply from  $18.2 \pm 29.2 \text{ pg m}^{-3}$ ,  $13.5 \pm 5.5 \text{ pg m}^{-3}$  to  $6.0 \pm 5.0 \text{ pg m}^{-3}$ ,**  
195 **and PBM concentrations decreased sharply from  $15.4 \pm 7.9 \text{ pg m}^{-3}$ ,  $7.9 \pm 3.4 \text{ pg m}^{-3}$  to  $3.9 \pm 3.6$**

196 **pg m<sup>-3</sup>.**'

197

198 **Comment #9**

199 Lines 36-37: While the passive sampling was for one year, stating the annual average here can be  
200 misleading since this information isn't in the abstract. It could also be beneficial to indicate the  
201 seasonal averages or variations instead of just an annual average.

202 **Response #9**

203 Thanks for the suggestion. We have rewritten this sentence to make it clear. The revised text is:  
204 **'The average GEM concentration in the Nyingchi region was obtained using passive sampler**  
205 **as 1.12±0.28 ng m<sup>-3</sup> (from April 4, 2019 to March 31, 2020).'**

206 In section 3.1, we have added seasonal variation to the passive sampling data plots and added a  
207 discussion of GEM seasonal variation. The added text is: **'In terms of seasonal variation, average**  
208 **GEM concentrations were the lowest in summer (1.03±0.09 ng m<sup>-3</sup>), with almost identical**  
209 **average concentrations in spring, autumn and winter (1.14±0.28 ng m<sup>-3</sup>, 1.16±0.35 ng m<sup>-3</sup> and**  
210 **1.14±0.28 ng m<sup>-3</sup>, respectively). This is different from the trends of GEM concentrations in the**  
211 **surrounding areas, where the highest GEM concentrations in Nam co, Mt. Ailao, Mt.**  
212 **Waliguan and Mt. Gongga (Yin et al., 2018; Zhang et al., 2016; Fu et al., 2012; Fu et al., 2008)**  
213 **were all seen in summer, which may indicate that the Indian summer winds that bring high**  
214 **GEM concentrations to these areas do not present similar effect on the SET region.'**

215

216 **Comment #10**

217 Lines 37-38: The authors should indicate the sampling area was clean compared to other high-  
218 altitude sites.

219 **Response #10**

220 We have added the information in the revised manuscript. Thanks for the suggestion. The revised  
221 text is: **'The GEM concentration showed that the sampling area was very clean compared to**  
222 **other high-altitude sites.'**

223

224 **Comment #11**

225 Lines 38-40: These sentences describe only half of the diurnal pattern in the respective periods. It  
226 could be beneficial to state other diurnal features present during the different periods. For instance,  
227 simply add that during the PISM afternoon concentrations were lower (which is still due to boundary  
228 layer dynamics) and that low concentrations of GEM were observed during the morning in the ISM  
229 due to vegetation effects.

230 **Response #11**

231 Thanks for the suggestion. We have added the information accordingly. The revised text is: **'Stable**  
232 **high GEM concentrations occur at night and low concentrations occur at afternoon during**  
233 **PISM, which may be related to the nocturnal boundary layer structure. High values occurring**  
234 **in the late afternoon during the ISM may be related to long-range transport. Low**

235 concentrations of GEM observed during the morning in the ISM may originate from  
236 vegetation effects.'

237

238 **Comment #12**

239 Line 42: Maybe 'circulation patterns' would fit better here than 'airflow fields'?

240 **Response #12**

241 We have replaced the words accordingly. Thanks for the suggestion.

242

243 **Comment #13**

244 Lines 42-43: The authors should indicate that westerly circulation occurs during the PISM.

245 **Response #13**

246 Thanks for the suggestion. We have added the information accordingly.

247

248 **Comment #14**

249 Lines 45-47: It would be helpful to know during which periods the different factors were dominant.

250 **Response #14**

251 Thanks for the suggestion. We have added the information accordingly. The added text is: '**Long-**  
252 **distance transport factor dominates during PISM and ISM3, while local emissions is the major**  
253 **contributor between PISM and ISM3.**'

254

255 **Comment #15**

256 Line 47: I feel the abstract is missing one sentence stating how this research will be valuable, similar  
257 to the wording on lines 121-122.

258 **Response #15**

259 Thanks for the suggestion. We added the following sentence here: '**Our results reveal the Hg**  
260 **species distribution and possible sources of the most important water vapor channel in the**  
261 **Tibetan Plateau, and could serve a basis for further transboundary transport flux**  
262 **calculations.**'

263

264 **Comment #16**

265 Line 50: This sentence requires a reference.

266 **Response #16**

267 Thanks for the suggestion. We have added Mason et al., 1994, and Mason et al., 1995 to support  
268 this statement.

269

270 **Comment #17**

271 Line 55: Are GOM and PBM undergoing chemical reactions that lead to their wet and dry deposition?  
272 To my knowledge, this is due to their water solubility (GOM and PBM) and low vapor pressure  
273 (GOM). Maybe the authors could be more specific in their description here.



274 **Response #17**

275 Thank you for pointing out the mistake. We have changed the statement in the revised manuscript,  
276 as follow: **‘In contrast, GOM and PBM are easily removed from the atmosphere through  
277 chemical reaction and deposition because of their chemical activity and water solubility, and  
278 could therefore bring significant impacts to the local environment (Lindberg and Stratton,  
279 1998; Seigneur et al., 2006).’**

280

281 **Comment #18**

282 Line 57: ‘physicochemical’ instead of ‘physiochemical’. I also make this mistake which is why I  
283 caught it.

284 **Response #18**

285 We have replaced the words accordingly. Thanks for the suggestion.

286

287 **Comment #19**

288 Line 60: ‘effects’

289 **Response #19**

290 We have replaced the words accordingly. Thanks for the suggestion.

291

292 **Comment #20**

293 Line 63-67: I am surprised the Arctic Monitoring Assessment Programme is not listed here (Arctic  
294 Monitoring and Assessment Programme | AMAP) as this is an important Hg monitoring network  
295 covering North American and European Arctic. Also, it be might be beneficial to the reader if  
296 references for individual networks are listed with the acronym, similar to the AMNet.

297 **Response #20**

298 Thanks for the suggestions. We have added the Arctic Monitoring Assessment Programme here.  
299 References of individual networks are also listed with acronyms in the revised manuscript, as follow:  
300 **‘The Atmospheric Mercury Network (AMNet; Gay et al., 2013), the Global Mercury  
301 Observation System (GMOS; Sprovieri et al., 2013; Sprovieri et al., 2016), the Canadian  
302 Atmospheric Mercury Network (CAMNet; Kellerhals et al., 2003) and the Arctic Monitoring  
303 Assessment Programme (AMAP; <https://mercury.amap.no/>) are the main monitoring  
304 networks operating in North America and Europe, and the majority of them only monitor  
305 GEM concentrations (Gay et al., 2013; Sprovieri et al., 2013; Sprovieri et al., 2016; Kellerhals  
306 et al., 2003).’**

307

308 **Comment #21**

309 Line 66: The semicolon may be removed and replaced with ‘and the’. In my opinion, this will  
310 improve the readability of the sentence.

311 **Response #21**

312 We have replaced it accordingly. Thanks for the suggestion.



313

314 **Comment #22**

315 Lines 80-81: As currently constructed, this sentence isn't representative of the text in Chen et al.  
316 (2016). From Chen et al. (2016) 'The total fuel-related atmospheric mercury emissions amount to  
317 859.12 t, to which coal, oil products and biomass contribute 85.77%, 9.06% and 5.17%, respectively.'  
318 So, it appears coal contributes 86 % of fuel combustion emissions. This sentence should be reworded  
319 to reflect this.

320 **Response #22**

321 Thank you for pointing out the mistake. We have changed the statement in the revised manuscript  
322 to make it clearer, as follow: '**Considering that coal is the largest emission source of Hg in the  
323 atmosphere (approximately 86% of fuel-related atmospheric Hg emissions come from fuel  
324 combustion (Chen et al., 2016)), both China and India have great Hg emission potential.**'

325

326 **Comment #23**

327 Line 112: The Tekran speciation units are quite uncertain in terms of collection efficiency  
328 (Maruszczak et al., 2017; Huang et al., 2017; Gustin et al., 2015), therefore I would recommend  
329 removal of the phrase 'high-precision' from this sentence.

330 Maruszczak, N., Sonke, J. E., Fu, X., and Jiskra, M.: Tropospheric GOM at the Pic du Midi  
331 Observatory – Correcting Bias in Denuder Based Observations, Environ. Sci. Technol., 51, 863–  
332 869, <https://doi.org/10.1021/acs.est.6b04999>, 2017.

333 Huang, J., Miller, M. B., Edgerton, E., and Sexauer Gustin, M.: Deciphering potential chemical  
334 compounds of gaseous oxidized mercury in Florida, USA, Atmos. Chem. Phys., 17, 1689–1698,  
335 <https://doi.org/10.5194/acp-17-1689-2017>, 2017.

336 Gustin, M. S., Dunham-Cheatham, S. M., Huang, J., Lindberg, S., and Lyman, S. N.: Development  
337 of an Understanding of Reactive Mercury in Ambient Air: A Review, Atmosphere, 12, 73,  
338 <https://doi.org/10.3390/atmos12010073>, 2021.

339 **Response #23**

340 Thanks for the suggestion. We agree with the reviewer that 'high-precision' is inappropriate here.  
341 We have replaced the phrase 'high-precision' with 'high time resolution'.

342

343 **Comment #24**

344 Line 117: When referring to 'cluster analysis', do the authors mean PCA or clustering of back  
345 trajectories?

346 **Response #24**

347 Thanks for the comment. It's the cluster analysis of back trajectories. We have changed the statement  
348 in the revised manuscript to make it clearer, as follow: '**To better identify the sources of Hg  
349 pollution and potential pollution areas, we combined real-time GEM monitoring data with  
350 backward trajectory analysis, and a follow-up cluster analysis of back trajectories.**'

351

352 **Comment #25**

353 Line 119: ‘sources’

354 **Response #25**

355 We have replaced it accordingly. Thanks for the suggestion.

356

357 **Comment #26**

358 Line 131: It could be helpful to the reader if the authors state the temperature for the PISM and the  
359 ISM since the manuscript revolves around these periods.

360 **Response #26**

361 Thanks for the suggestion. We have added the information accordingly. ‘**The average annual air  
362 temperature is 5.6 °C, the average air temperature during PISM and ISM periods are 6.0 °C  
363 and 12.0 °C, respectively.**’

364

365 **Comment #27**

366 Line 134: Other than the YZB Grand Canyon, what are the other water vapor channels?

367 **Response #27**

368 Many studies of the water vapor pathway have concluded that YZB Grand Canyon is the only major  
369 water vapor transport channel on the southern Tibetan Plateau (Ping and Bo, 2018; Yan et al., 2020;  
370 Gong et al., 2019b; Feng and Zhou, 2012).

371

372 **Comment #28**

373 Lines 134-135: Similar comment as above but for precipitation.

374 **Response #28**

375 Many studies of the water vapor pathway have concluded that YZB Grand Canyon is the only major  
376 water vapor transport channel on the southern Tibetan Plateau (Ping and Bo, 2018; Yan et al., 2020;  
377 Gong et al., 2019b; Feng and Zhou, 2012).

378

379 **Comment #29**

380 Line 141: Can the authors give some examples of this unique high-altitude distribution pattern of  
381 biomes and vegetation in the area? This would aid the reader and help explain the interpretation that  
382 vegetation effects have a significant effect on GEM concentrations.

383 **Response #29**

384 Thanks for the suggestion. We have added some information accordingly. ‘**Interactions between  
385 terrestrial ecosystems and atmosphere have contributed to the development of diverse biomes  
386 and distinctive vegetation elevation distribution patterns from tropical rainforests to boreal  
387 forests and tundra.**’

388

389 **Comment #30**

390 Line 149: These dates are different from the ones listed in the abstract.

391 **Response #30**

392 Thanks for pointing out the mistake. We have re-examined the data and made revisions. The correct  
393 deployment time should be from March 30 to September 3, 2019, as described in the abstract.

394

395 **Comment #31**

396 Line 155: 'drawn in' instead of 'sucked' and 'into' instead of 'in'.

397 **Response #31**

398 We have replaced it accordingly. Thanks for the suggestion.

399

400 **Comment #32**

401 Lines 157-160: Having worked with the Tekran instruments, I understand what is meant when the  
402 authors describe the sample collection procedure, however, a reader unfamiliar with this procedure  
403 could misinterpret the text. The time required to collect and analyze one sample is two hours, one  
404 hour for collection and one hour for analysis. This isn't stated clearly here, I suggest rephrasing  
405 these sentences to make this clearer to the reader.

406 **Response #32**

407 Thanks for the suggestion. We have changed the description of the sample collection procedure in  
408 the revised manuscript to make it clearer. The revised text is: '**A complete measurement cycle  
409 takes two hours. During the first hour, GOM was enriched on a KCL-coated annular denuder,  
410 PBM was enriched on a quartz fiber filter (QFF), and GEM was directly enriched on the gold  
411 tube of the Tekran 2537B and measured directly by cold vapor atomic fluorescence  
412 spectroscopy (CVAFS). The collected PBM and GOM were desorbed in succession to Hg(0)  
413 at temperatures of 800 °C and 500 °C in the following hour, respectively. Then the Hg(0) was  
414 measured by Tekran 2537B.**'

415

416 **Comment #33**

417 Lines 165-167: Can the authors elaborate on the method from Slemr et al. (2016)?

418 **Response #33**

419 Thanks for the suggestion. According to Slemr et al. (2016), the small captured Hg amount would  
420 probably cause the bias of the measurement. Considering the high altitude at which the instrument  
421 was installed, as well as to mitigate the impacts of low atmospheric pressures on the pump's  
422 operation, a low air sampling rate of 7 L min<sup>-1</sup> for the pump model and 0.75 L min<sup>-1</sup> (at standard  
423 pressure and temperature) for model 2537B were applied in this study. We have used the function  
424 given in Figure 3 in Slemr et al. (2016) to correct the data obtained from the monitoring.

425

426 **Comment #34**

427 Line 170: Again, these dates are different from the abstract. These dates need to be reconciled. Also,  
428 why is a day not stated here when it is other places.

429 **Response #34**

430 Thanks for pointing it out. The sampling period of passive samplers was from April 4, 2019 to  
431 March 31, 2020. We have added the date to the abstract.

432

433 **Comment #35**

434 Lines 173-174: The authors need to state a more precise sampling interval for the passive samplers.

435 **Response #35**

436 Thanks for the suggestion. The sampling intervals for the passive samplers were close to once a  
437 month from April 4 to July 10, 2019, and three times a month from July 10, 2019 to March 31, 2020.  
438 We have added detailed start and finish times for every sampling period in the support information.

439

440 **Comment #36**

441 Line 175: What is a DMA-80? Can the authors give more information on this instrument?

442 **Response #36**

443 Thanks for the suggestion. We have added more information about DMA-80 in the revised  
444 manuscript. We also provided our previous studies as a reference with detailed information on  
445 laboratory analysis procedures. **‘DMA-80 is an instrument that was used in accordance with US  
446 EPA Method 7473, using a combined sequence of thermal decomposition, mercury  
447 amalgamation and atomic absorption spectrophotometry (Zhang et al., 2012).’**

448

449 **Comment #37**

450 Line 199: Would ‘air parcels’ be a better term than ‘matter’ in this context?

451 **Response #37**

452 We have replaced it accordingly. Thanks for the suggestion.

453

454 **Comment #38**

455 Lines 202-203: What is the typical boundary layer height at Nyingchi? Are there times when the  
456 boundary layer is below 1000 m? Have the authors varied the arrival height to see its effect on air  
457 mass origin? Have the authors calculated trajectories longer than 72 hours? For GOM and PBM,  
458 this length is reasonable, however, for GEM the lifetime is much longer and could be affected by  
459 sources further away than 72 hours. While the input meteorological data is at a time resolution of 6  
460 h, the HYSPLIT model can interpolate these data and produce hourly trajectories. This would  
461 increase the uncertainty but would allow for measurements of GOM and PBM to be integrated with  
462 these trajectories. Have the authors explored such an analysis? Do the authors mean ‘simulated’  
463 instead of ‘stimulated’?

464 **Response #38**

465 Thanks for the suggestion. The relatively high trajectory arrival height was set mainly due to  
466 concerns that the complex topography of the Tibetan Plateau might cause significant disruptions to  
467 the trajectory. We reviewed the data and found out that the average boundary layer height in  
468 Nyingchi is 457 m (data from Global Data Assimilation System (GDAS)). In the revised manuscript,

469 we have recalculated all trajectories and redo all the simulations associated with the trajectories.  
470 The arrival height was set at 200 m a.g.l., which is about half of the boundary layer height.  
471 Considering that a longer simulation time will bring higher trajectories uncertainty, and 120 hours  
472 are sufficient for trajectories transmission over longer distances, every backward trajectory was  
473 simulated for 120 hours at 3 hours intervals. Also, we examined the effect of arrival height on the  
474 trajectories using different arrival heights (20m, 50m, 200m and 500m, respectively) in June 2019.  
475 The results show that the calculated trajectories of the air masses are almost the same when the  
476 arrival height is below 500m. The figure below shows the trajectories to Nyingchi in June 2019 with  
477 different air masses arrival heights. We also added the results in the support information in the  
478 revised manuscript.

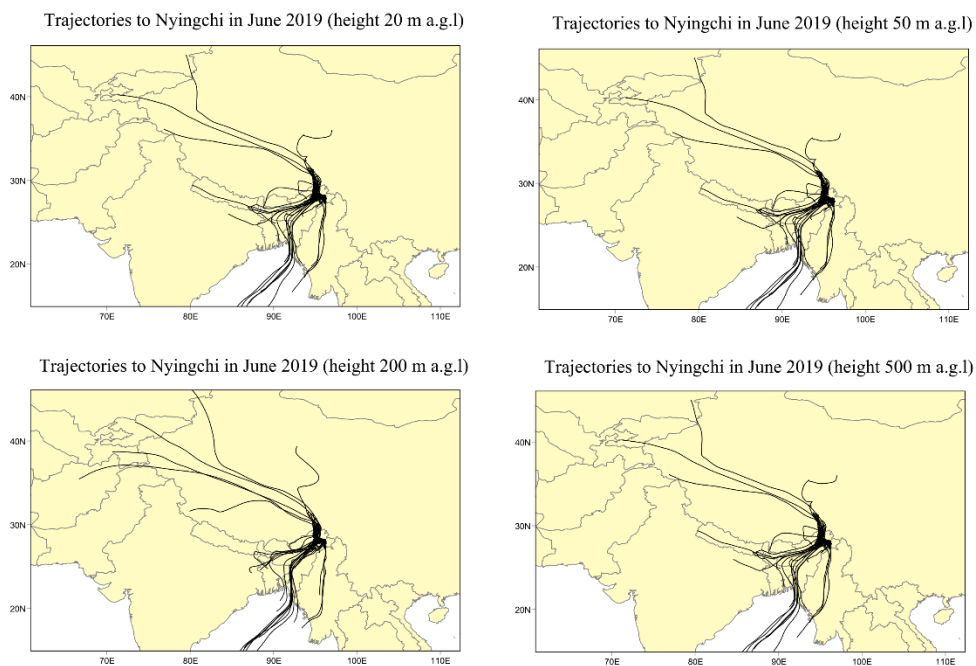

479  
480 **Figure Trajectories to Nyingchi in June 2019 with different air masses arrival heights**

481  
482 In this manuscript, we only carried out trajectory analysis for GEM. Considering the complex  
483 topography of the Tibetan Plateau and the fact that most of the trajectories pass through the YZB  
484 Grand Canyon, where the subsidence of GOM or PBM is more complex, we think that backward  
485 trajectory simulations of GOM and PBM at Nyingchi may introduce considerable errors. We hope  
486 that future work could help identify the transport behavior and speciation transformations of GOM  
487 and PBM through more refined simulations and more observational data.

488 We have replaced ‘stimulated ’with ‘simulated’ accordingly. Thanks for pointing out the mistake.  
489 We have changed the description of the backward trajectory simulations in the revised manuscript  
490 to make it clearer. The revised text is: **‘The trajectory arrival height was set to 200 m a.g.l., which  
491 is about half of the boundary layer height. We examined the effects of arrival height on the  
492 trajectories using different arrival heights (20m, 50m, 200m and 500m respectively) in June  
493 2019. The results show that the calculated trajectories of the air masses are almost the same**

494 when the arrival height is below 500m (Figure S3). Each backward trajectory was simulated  
495 for 120 hours at 3 hours intervals for GEM, which can cover China, Nepal, India, Pakistan,  
496 and the majority of western Asia.’

497 We have reorganized the trajectory cluster analyses section as follow: ‘During the PISM period  
498 (Figure 5a), the trajectories mainly originated from or passed through central India,  
499 northeastern India, and central Tibet, and moved along the southern border of the Himalayas  
500 Mountains. During this period, the meteorological factors at Nyingchi were mainly controlled  
501 by westerly circulation. The cluster with the highest concentration (cluster2, with GEM  
502 concentration of 1.19 ng m<sup>-3</sup>) originated from or passed through central Tibet, accounting for  
503 13.75% of all trajectories in this period. Although the GEM concentrations of the cluster were  
504 relatively high during this period, they were still lower than the background GEM  
505 concentration in the Northern Hemisphere (~ 1.5-1.7 ng m<sup>-3</sup>), indicating that the air mass  
506 transported to the SET station is relatively clean. Cluster1, from the southern border of the  
507 Himalayas, was relatively high in proportion (with a frequency of 78.58%), mainly controlled  
508 by the southern branch of the westerly circulation, and has a relatively low concentration (1.12  
509 m<sup>-3</sup>). This cluster made a turn in the south of SET station and began to ascend toward the  
510 Tibetan Plateau. According to the UNEP reports, Hg emission intensities along the trajectory  
511 paths were weak (UNEP, 2018; UNEP, 2013).

512 During the ISM period (Figure 5b-d), the trajectories of arrivals at the SET site changed  
513 significantly with the onset and rise of the Indian monsoon. The clusters undergo a slight  
514 counter-clockwise rotation. As the source of the air mass changes and the monsoon enters the  
515 plateau, it is possible that the concentrations of pollutants decrease because of the change in  
516 the source region. With the development of the Indian monsoon, it brings an abundance of  
517 water vapor (Ping and Bo, 2018), which may cause strong deposition during transportation.  
518 During the ISM1 period (Figure 5b), both the rising monsoon and the tail of the westerly  
519 circulation control the meteorological factor at the region, causing the transported air masses  
520 to exhibit complex trajectories and combined effects. The cluster with the highest  
521 concentration (cluster4, 0.96 ng m<sup>-3</sup>, and 14.02%) mainly came from or passed through central  
522 India. Cluster3 share almost the same transport path with cluster4 while having shorter length  
523 and lower GEM concentration, which may indicate that cluster4 was affected by GEM  
524 emission in central India. The trajectory with the largest proportion (cluster1, 43.94%) had a  
525 relatively short path, mainly from northeast India, and showed very low GEM concentration  
526 (0.92 ng m<sup>-3</sup>). Based on the existing atmospheric Hg emission inventories (Simone et al., 2016;  
527 UNEP, 2018; UNEP, 2013), the Hg emission intensities in cluster1 transport path are very low,  
528 which may be the reason for the low GEM concentration in this cluster.

529 During the ISM2 period (Figure 5c), a typical period of Indian monsoon, almost all  
530 trajectories came from or passed through the southern part of the SET site and were  
531 influenced by the monsoon. The GEM concentration of cluster trajectories at this stage was  
532 below 1.00 ng m<sup>-3</sup>. The majority of trajectories (cluster2, 85.82%) through the YZB Grand

533 Canyon to the SET station and have a short transport path, which may be related to the high  
534 resistance of the dense vegetation in summer. Only about 2.24% of the trajectories originated  
535 from central Tibet with very low GEM concentration (cluster3 with 0.99 ng m<sup>-3</sup>). During this  
536 period, the ISM originated from the Indian Ocean brought a large amount of water vapor and  
537 caused considerable precipitation during the transportation. At the same time, the areas  
538 through which the trajectory passed were sparsely populated and underdeveloped and were  
539 unable replenish Hg species to the air masses. The range of GEM concentrations during the  
540 ISM2 phase was extremely small (Figure 2), which may indicate that under the strongly Indian  
541 monsoon, the main source region, transport path, and mechanism of transportation during  
542 this period remain stable.

543 During the ISM3 period (Figure 5d), the Indian monsoon remained controlling the  
544 meteorological factors at the SET station, but its intensity was weakened, and the precipitation  
545 in the Nyingchi area was greatly reduced. The trajectories transmission distances are all short.  
546 All of the trajectories still came from south of SET station and transported through the YZB  
547 Grand Canyon. It is difficult to distinguish these clusters, but according to the UNEP (2018)  
548 Report, it is clear that the areas for which the clusters passed through have very little emission.  
549 The GEM concentration at SET increased compared with the ISM1-2 periods (average at 0.92  
550 ng m<sup>-3</sup> in ISM1 and ISM2, and 1.04 ng m<sup>-3</sup> in ISM3 periods, respectively). This may indicate  
551 that the GEM source is farther away. At the end of the ISM3 period, the GEM concentration  
552 showed an upward trend (Figure 2), which may be due to the weakening of the influence of  
553 the monsoon. A shortened trajectory at the end of the monsoon period was also observed in  
554 another study at a nearby site (QNNP) (Lin et al., 2019), which may indicate the withdrawal  
555 of the monsoon.'

556

557 **Comment #39**

558 Lines 204-205: The last sentence in this paragraph needs to be reworded.

559 **Response #39**

560 Thanks for the suggestion. We have reworded the sentence as follow 'Cluster analysis can help  
561 identify the average air masses transport path by averaging similar or identical paths in the  
562 existing air masses paths, and provide major directions of GEM transported to the  
563 measurement site.'

564

565 **Comment #40**

566 Lines 206-212: The description of PSCF needs to be expanded. What was the threshold percentile?  
567 What was the arbitrary weighting function used? These parameters need to be stated for this research  
568 to be reproducible.

569 **Response #40**

570 Thanks for the suggestion. We agree with the reviewer that PSCF analysis couldn't provide gainful  
571 information in this manuscript. We have decided to delete the PSCF related discussion.



572

573 **Comment #41**

574 Lines 218-222: Can the authors elaborate on the tests and procedures used for determining the  
575 optimal solution for the PCA analysis? For example, what are the Kaiser-Meyer-Olkin measure of  
576 sampling adequacy and Bartlett's test of sphericity used for? What was the outcome? Please define  
577 MSA. Were there multiple elbows in the scree plots?

578 **Response #41**

579 Thanks for the suggestion. The Kaiser-Meyer-Olkin measure of sampling adequacy ( $>0.5$ ) and  
580 Bartlett's Test of sphericity ( $p < 0.05$ ) tests are used to determine that PCA is a suitable method for  
581 the data set. This test is to ensure that the PCA has been used correctly and to guarantee the reliability  
582 of the analysis results. MSA is an abbreviation of measure of sampling adequacy. In our analysis  
583 process, there is only one obvious elbow in every scree plot. We have revised the manuscript to  
584 make it clear, as follow: 'To ensure that the PCA is a suitable method for the data set in this  
585 study, the Kaiser-Meyer-Olkin measure of sampling adequacy ( $> 0.5$ ) and Bartlett's test of  
586 sphericity ( $p < 0.05$ ) tests were performed in the initial PCA run.'

587

588 **Comment #42**

589 Line 228: The text states 'daily' here and in other places, but the rightmost y-axis label in Fig. 2  
590 gives units of 'nm<sup>2</sup> hour'. Can the authors please clarify this discrepancy?

591 **Response #42**

592 Thanks for pointing out the mistake. We reviewed the rainfall data and found that the rainfall  
593 resolutions are 2 hours. We have deleted 'daily' in the revised manuscript accordingly. The title of  
594 Figure 2 has also been revised.

595

596 **Comment #43**

597 Lines 231-232: What are the criteria for dividing the ISM into three periods in terms of precipitation?  
598 Please elaborate on these criteria and the reasoning behind the selection of the timing of the different  
599 periods.

600 **Response #43**

601 Thanks for the suggestion. The ISM period was further subdivided into three periods (ISM1 – ISM3).  
602 However, there is no strict criteria for the selection of the timing of the different periods. We made  
603 a rough division based on the changes of precipitation and the development of the monsoon.

604

605 **Comment #44**

606 Lines 232-235: Please see my comments about listing the concentrations for different ISM periods  
607 from the abstract.

608 **Response #44**

609 Thanks for the suggestion. We have listed average concentrations of GEM, GOM, PBM for all three  
610 periods in the revised manuscript. We also provided statistics metrics of Hg species, meteorological

611 factors and other pollutants for all periods in the support information, as follows: ‘From ISM1 to  
612 ISM3, the average GEM concentrations increased from  $0.92\pm 0.23$  ng m<sup>-3</sup>,  $0.92\pm 0.18$  ng m<sup>-3</sup> to  
613  $1.04\pm 0.21$  ng m<sup>-3</sup>, while GOM concentrations decreased sharply from  $18.2\pm 29.2$  pg m<sup>-3</sup>,  
614  $13.5\pm 5.5$  pg m<sup>-3</sup> to  $6.0\pm 5.0$  pg m<sup>-3</sup>, PBM concentrations decreased sharply from  $15.4\pm 7.9$  pg m<sup>-3</sup>,  
615  $7.9\pm 3.4$  pg m<sup>-3</sup> to  $3.9\pm 3.6$  pg m<sup>-3</sup>.’

616

617 **Comment #45**

618 Line 235: I think the words ‘locally monitored’ can be omitted.

619 **Response #45**

620 Thanks for the suggestion. We have deleted it accordingly.

621

622 **Comment #46**

623 Line 237: Same but for ‘decisive’.

624 **Response #46**

625 Thanks for the suggestion. We have deleted it accordingly.

626

627 **Comment #47**

628 Line 243: I feel there is a better reference for the chemical properties of GEM than Horowitz et al.  
629 (2017), which deals with modeled redox chemistry of Hg. Possibly a review paper, or references  
630 from a review paper, might be more appropriate here.

631 **Response #47**

632 Thanks for the suggestion. We have changed the reference (Selin, 2009).

633

634 **Comment #48**

635 Lines 244-246: Is this total precipitation or an average during these periods? It is interesting that  
636 GOM decreased by roughly half while PBM only decreased by ~25 %.

637 **Response #48**

638 Thanks for pointing out the mistake. It is total precipitation in the monitoring station during these  
639 periods, and we have revised it to make it clear. We also found that the concentrations of GOM and  
640 PBM have been listed in the wrong order. Actually, the GOM decreased by ~25 % while PBM  
641 decreased by roughly half. Revisions are as follow: ‘**With the increase in rainfall from 113.75**  
642 **mm during ISM1 period to 373.28 mm during ISM2 period (total precipitation), the**  
643 **concentrations of GOM and PBM decreased sharply from  $18.2\pm 29.2$  pg m<sup>-3</sup> and  $15.4\pm 7.9$  pg**  
644 **m<sup>-3</sup> to  $13.5\pm 5.5$  pg m<sup>-3</sup> and  $7.9\pm 3.4$  pg m<sup>-3</sup>, respectively.’**

645

646 **Comment #49**

647 Lines 249-252: This is an important result of a previous study. During the PISM, GEM is mainly  
648 from long-range transport, while during the ISM local emissions is an important source of GOM  
649 and PBM (from the PCA analysis). These local emissions could be important for total Hg in

650 rainwater.

651 **Response #49**

652 We agree with the reviewer that the local emissions could be important for total Hg in rainwater  
653 during ISM period. We have added a discussion about local emissions in the revised manuscript.

654

655 **Comment #50**

656 Line 255-258: It was stated in the site description that westerly circulation patterns are dominant  
657 from September to April and that ISM circulation patterns are dominant from May to August. Was  
658 this information obtained through trajectory analysis or previous knowledge from the site? This  
659 information is again presented here and used to explain the higher passive sampler GEM  
660 concentrations in the later part of the sampling period. I am curious if any trajectories were  
661 calculated for the passive sampler period? This could be used to directly support the  
662 abovementioned statements. The large variations in the passive sampler period, in my opinion,  
663 warrant further investigation. What were the meteorological conditions or transport patterns under  
664 high and low concentrations?

665 **Response #50**

666 Thanks for the comments and suggestions. The Asian summer monsoon and the mid-latitude  
667 Westerlies are major atmospheric circulation systems influencing the climate of the Tibetan Plateau,  
668 which could be seen in previous studies (Yao et al., 2013; Benn and Owen, 1998; Kotlia et al., 2015;  
669 Sun et al., 2020; Liu et al., 2016; Huang et al., 2013). The Indian Monsoon Index can be used to  
670 determine the onset of the summer monsoon. We have added the Indian Monsoon Index for 2019 in  
671 the supporting information (Figure S1), with the Indian monsoon starting to break out in May, 2019  
672 and becoming the dominant wind field. We also calculated the trajectories for the entire passive  
673 sampler period, and added a discussion of the sources of trajectories for the different seasons and a  
674 discussion of the trajectories for the higher and lower monitored concentrations in the passive  
675 sampler period in section 3.3. The added text is: **‘We also calculated backward trajectories for  
676 the passive sampler monitoring period. Figure S4 shows the trajectories of air masses arriving  
677 at the SET station in different seasons. Due to the low accuracy of the data obtained from  
678 passive sampling, we didn’t combine the GEM concentrations from the passive sampler  
679 monitoring with the trajectories here. Except for winter, the vast majority of trajectories  
680 originated from the south of the SET station, and most of the trajectories are short in distance.  
681 This may be related to the complex local topography, which may also suggest that long-  
682 distance transport has limited effect on SET station. There is a partial shift of the backward  
683 trajectory from the southwest to the south in spring, compared to summer, which may  
684 originate mainly from the influence of the Indian monsoon. The abundance of precipitation,  
685 halogens from the Indian monsoon, and rapid growth of vegetation during the monsoon period  
686 may have depleted Hg species, and resulted in the lower GEM concentrations in summer.  
687 Trajectories from the northern branch of the westerly circulation were more abundant in  
688 autumn compared to winter, but did not appear to have an impact on local mean GEM**

689 concentrations. Because of the large concentration variations in the passive sampling  
690 monitoring, we aggregated the trajectories for the periods of high concentrations (GEM  
691 concentrations above  $1.5 \text{ ng m}^{-3}$ ) and low concentrations (GEM concentrations below  $1.0 \text{ ng}$   
692  $\text{m}^{-3}$ ) and performed a cluster analysis. The majority of trajectories in both categories were  
693 from the southern part of the SET station and were of similar length (Figure S5), which  
694 indicates that the differences in concentrations monitored by passive sampling may not be  
695 related to external transport. '

696

697 **Comment #51**

698 Lines 258-260: I agree this is most likely the case, given the Hg emission inventory and trajectory  
699 clusters plotted in Fig. 5. Calculating trajectories for the entire passive sampler period would directly  
700 show this.

701 **Response #51**

702 We have calculated trajectories for the entire passive sampler period and added a discussion of the  
703 sources of trajectories for the different seasons and a discussion of the trajectories for the higher and  
704 lower monitored concentrations in the passive sampler period in section 3.3.

705

706 **Comment #52**

707 Lines 260-262: This is nice since it gives the reader context, however, maybe it would benefit the  
708 reader to move it to the beginning of this paragraph.

709 **Response #52**

710 Thanks for the suggestion. We agree with the reviewer that it should be more appropriately placed  
711 at the beginning of the paragraph.

712

713 **Comment #53**

714 Line 272: Is there a better way to say 'monsoon control zones'? See general comments above.

715 **Response #53**

716 Thanks for the suggestion. We have revised the presentation and carefully revised other relevant  
717 presentations throughout the text.

718

719 **Comment #54**

720 Line 276: I feel there is a better phrase than 'violent' to describe depositional processes. Possibly  
721 'extreme'?

722 **Response #54**

723 Thanks for the suggestion. We agree that 'extreme' is better here.

724

725 **Comment #55**

726 Lines 283-284: 'generally believed' isn't the most appropriate language for a scientific article.  
727 Please rephrase.

728 **Response #55**

729 Thanks for the suggestion. We have revised as follow: ‘Previous studies (Lin et al., 2019; Gong et  
730 al., 2019a; Wang et al., 2015) indicated that pollutants from the heavily polluted Indian subcontinent  
731 may be transported to the Tibetan Plateau under the action of ISM, resulting in increased local  
732 pollutant concentrations on the plateau.’

733

734 **Comment #56**

735 Line 290: Fu et al. (2016) provide an excellent explanation of the decrease of GEM over the whole  
736 ISM and the diurnal profile at night. However, this study was conducted in a different geographical  
737 region and at a lower altitude. Can the authors offer any reasoning for why this effect is valid at both  
738 locations? For instance, is there similar vegetation at both sites?

739 **Response #56**

740 The forest in Fu et al. (2016) is dominated by *Pinus koraiensis*, *Fraxinus mandshurica*, *Tilia*  
741 *amurensis*, *Acer mono* and *Quercus mongolica*. In the YZB Grand Canyon, interactions between  
742 terrestrial ecosystems and the atmosphere have contributed to the development of diverse biomes  
743 and distinctive vegetation elevation distribution patterns from tropical rainforests to boreal forests  
744 and tundra. Major tree species in Fu et al. (2016) can be found in the YZB Grand Canyon. So we  
745 believed that the effect is also valid at the Grand Canyon.

746

747 **Comment #57**

748 Line 291: This is also a very logical explanation for the decrease in GEM during the ISM, however,  
749 this statement requires a reference. Have other locations in India observed enhancements of  
750 halogens during the ISM?

751 **Response #57**

752 Thanks for the suggestion. We have added a reference (Fiehn et al., 2017) here.

753

754 **Comment #58**

755 Lines 291-293: From Fig. 2, it appears that during the beginning of ISM1 GOM concentrations are  
756 lower than ISM2 and on a similar level to ISM3. However, there is a large spike in GOM at the end  
757 of ISM1 that could be skewing the average for this period. Has this spike in GOM been investigated  
758 in more detail?

759 **Response #58**

760 Thanks for the comment. It is an interesting phenomenon. We have added a discussion at the end of  
761 section 3.1, as follow: ‘**Table S3 shows the variations of Hg species, meteorological factors and  
762 other pollutants from June 1 to 4, 2019. High GOM concentrations were observed on June 2  
763 and 3, and very high solar radiation and UV Index were also observed in these days. PBM  
764 concentrations, relative humidity and O<sub>3</sub> were low during this period. The solar radiation was  
765 nearly twice the mean value of the ISM1 phase (162.79 W m<sup>-2</sup>, Table S2), and thus higher solar  
766 radiation might contribute to the higher GOM concentrations. Some of the PBM might be**

767 converted to GOM, but the decrease in PBM concentration was less than the increase in GOM  
768 concentration. Generally higher O<sub>3</sub> concentrations should be observed at higher solar  
769 radiation (Kondratyev et al., 1996), but lower O<sub>3</sub> concentrations were found at Nyingchi,  
770 suggesting that O<sub>3</sub> may contribute to the formation of GOM. The oxidation of GEM by OH  
771 and O<sub>3</sub> to generate GOM has been discussed in previous studies in model simulations (Sillman  
772 et al., 2007), which may explain the reduced concentration of O<sub>3</sub>, while OH radicals may be  
773 associated with higher solar radiation. The mechanism of GOM formation should be further  
774 explored in future studies.'

775

776 **Comment #59**

777 Line 297: 'deposit' instead of 'settle' since you are referring to wet deposition.

778 **Response #59**

779 Thanks for the suggestion. We agree that 'deposit' is better here.

780

781 **Comment #60**

782 Figure 4: It is impossible to extract information from these figures. Seven axes on one figure are  
783 way too many. The lettering for each panel is also very large compared to the figures themselves.  
784 The combination of lines with errors represented by dashed lines and dots of small sizes and similar  
785 colors is dizzying and makes interpretation unnecessarily difficult. I do not understand why so many  
786 parameters are presented when only the Hg species are discussed briefly in the text.

787 I would suggest either group the Hg species and meteorological parameters separately or group  
788 parameters with a similar diurnal profile together. I would then opt for the former and put the diurnal  
789 profile of meteorological parameters in the supplement.

790 **Response #60**

791 Thanks for the suggestion. We agree with the reviewer that the figures contain too much information.  
792 We have redrawn the diurnal variation figures by keeping only GEM and error range, GOM, PBM  
793 and wind speed information in the figure.

794

795 **Comment #61**

796 Line 314: Any statement that mentions 'previous research' requires references and citations, both of  
797 which are missing from this sentence.

798 **Response #61**

799 Thanks for the suggestion. We have added some references accordingly. We also checked for similar  
800 problems throughout the article.

801

802 **Comment #62**

803 Lines 323-325: Can the authors expound upon this speculation? They have offered yak dung as a  
804 possible source of local emissions elsewhere in the text, is there any other possible local sources of  
805 Hg that could explain this observation?

806 **Response #62**

807 Thanks for the suggestion. There is no evidence that yak dung is the major reason of the higher  
808 GOM concentrations during ISM1. Firstly, from PISM to ISM1, the total amount of yak dung used  
809 by residents is decreasing due to the increase in air temperature; Secondly, the Nyingchi area is  
810 sparsely populated and the emissions from yak dung should be small. More field studies in the future  
811 are needed to provide more accurate explanation.

812 As the discussion we added in the last paragraph of section 3.1, we suggested that higher  
813 concentrations of GOM are more likely to be related to the widespread local glacier, higher solar  
814 radiation and O<sub>3</sub> concentrations, but there is currently insufficient evidence to support this claim.

815 We have added a short discussion here, as follows: **‘The oxidation of GEM by OH and O<sub>3</sub> to  
816 generate GOM may be a possible reason for the high GOM concentration (Sillman et al., 2007).  
817 However, the mechanism of GOM formation should be further explored.’**

818

819 **Comment #63**

820 Lines 330-331: I am not sure what is meant by ‘chemical dissipation’, and there was nothing in the  
821 references given. Do the authors mean chemical reactions? Also, the references don’t support the  
822 statements in the sentence.

823 **Response #63**

824 Thanks for pointing out the mistake. We have rewritten this sentence as follow: **‘The decrease in  
825 GEM concentration at night may be due to the interaction of pollutants from regional  
826 emissions and long-range transport (Fu et al., 2008; Fu et al., 2010).’**

827

828 **Comment #64**

829 Line 346: Holmes et al. (2010) isn’t an appropriate reference for the reduction of GOM in local  
830 snowy mountains. Is there not more specific studies (possible lab or field campaigns) that show this  
831 mechanism in more detail?

832 **Response #64**

833 Thanks for the suggestion. We have replaced the reference with ‘(Lalonde et al., 2003; Lalonde et  
834 al., 2002)’.

835

836 **Comment #65**

837 Lines 346-347: What do the authors mean by ‘field GEM source’?

838 **Response #65**

839 Thanks for the comment. We have rewritten it as follow: **‘The gradual increase in GEM  
840 concentration during the daytime may be due to the reduction of GOM from nearby local  
841 snowy mountains (Lalonde et al., 2003; Lalonde et al., 2002) or long-range transported GEM  
842 brought in by airflow (Lin et al., 2019).’**

843

844 **Comment #66**



845 Lines 349-350: Please provide references for the Indian Ocean being a source of halogens.

846 **Response #66**

847 Thanks for the suggestion. We have added '(Fiehn et al., 2017)' here as a reference.

848

849 **Comment #67**

850 Figure 5: Making the size of the cluster trajectory is a very nice way of intuitively showing the  
851 relative proportion of each cluster occurrence, however, it is difficult to grasp the absolute  
852 percentage from the legend (this is just an observation not necessarily a suggestion to change it).

853 Starting the cluster index at zero is a matter of taste, but it is intuitively easier to understand when  
854 the index starts at one.

855 A color scale or color bar is required for the emissions inventories.

856 Having all the color scales for GEM the same might make it easier to notice the differences between  
857 different periods

858 **Response #67**

859 Thanks for the suggestion. We have redrawn the trajectory and retained the trajectory size settings.

860 We have also detailed the cluster number, GEM concentration and ratio on the trajectory edges. We  
861 started the cluster index at one in the revised manuscript. A color scale has been added for the  
862 emission inventories. The trajectories color setting has been removed in the new version.

863

864 **Comment #68**

865 Line 360: This sentence needs to be reworded. See general comments above.

866 **Response #68**

867 Thanks for the suggestion. We have reworded it to make it clear, as follow: **'During this period,**  
868 **the meteorological factors at Nyingchi were mainly controlled by westerly circulation.'**

869

870 **Comment #69**

871 Line 365: 'relatively'.

872 **Response #69**

873 Thanks for the suggestion. We have replaced the word accordingly.

874

875 **Comment #70**

876 Line 367-369: This information about the cluster turning in the Bay of Bengal is not represented in  
877 the cluster average. It might be beneficial to show the individual trajectories for each cluster in the  
878 supplement. Also, as currently constructed, the citation to the UNEP reports appears to reference  
879 the turn in trajectories. I suggest moving the citations to the end of the sentence, this would alleviate  
880 any confusion.

881 **Response #70**

882 Thanks for the suggestion. We have deleted the discussion about the Bay of Bengal accordingly.  
883 Showing the individual trajectories for each cluster will not display valid information because there

884 are too many trajectories. The reference has been moved to the end of the sentence accordingly.

885

886 **Comment #71**

887 Lines 370-372: This is true for GOM and PBM, however, not for GEM, which as stated above in  
888 the text, isn't very water-soluble. This is an example, where specifying which Hg species the authors  
889 are referring to would lessen any confusion from the reader's perspective.

890 **Response #71**

891 Thanks for the suggestion. We have deleted it accordingly. We carefully reviewed the article in  
892 relation to "Hg concentrations" and we have carefully polished the language of the manuscript. The  
893 trajectory simulation is performed for GEM only, as we have hinted at the beginning of the section:  
894 **'To further investigate the contributions of different sources to the SET site, air mass back  
895 trajectory simulation and trajectory cluster analyses were performed for GEM.'**

896

897 **Comment #72**

898 Lines 374-375: Showing the individual trajectories for each cluster during this period would directly  
899 show what the text is stating, as right now, the statement is not evident from Fig. 5b.

900 **Response #72**

901 Thanks for the suggestion. Showing the individual trajectories for each cluster will not display valid  
902 information because there are too many trajectories. We have reworded this sentence as follow:  
903 **'The clusters undergo a slight counter-clockwise rotation.'**

904

905 **Comment #73**

906 Lines 377-378: HYSPLIT can output precipitation and H<sub>2</sub>O mixing ratio at each trajectory step,  
907 this information would show what the authors are suggesting — water vapor is increased when air  
908 masses arrive from the Indian Ocean.

909 **Response #73**

910 Thanks for the suggestion. We have changed it as: **'With the development of the Indian monsoon,  
911 it brings an abundance of water vapor (Ping and Bo, 2018).'**

912

913 **Comment #74**

914 Lines 383-386: A color bar for the Hg emission inventories would be helpful here.

915 **Response #74**

916 Thanks for the suggestion. A color bar has been added accordingly.

917

918 **Comment #75**

919 Line 391: De Simone et al. (2015) is about modeled Hg emissions from biomass burning and not  
920 with anthropogenic emissions. The UNEP reports seem like a better reference for this statement.

921 **Response #75**

922 Thanks for the suggestion. We have changed the citation accordingly.

923

924 **Comment #76**

925 Line 393: It would be more appropriate to list the references given in Lin et al. (2019) for yak dung  
926 burning instead of just Lin et al. (2019). I wonder why these references were not given in other  
927 locations where yak dung is mentioned. The words ‘yak dung’ does not appear in Huang et al. (2016).  
928 Also, the reference for Lin et al. (2019), Lines 730- 733, appears to be incorrectly formatted.

929 **Response #76**

930 Thanks for the suggestion. We have updated the references for yak dung burning here and elsewhere.

931

932 **Comment #77**

933 Line 402: Which species of Hg?

934 **Response #77**

935 The trajectory simulation is performed for GEM only. We have deleted this sentence in the revised  
936 version.

937

938 **Comment #78**

939 Line 407: Can the authors show that many wildfires existed during this period?

940 **Response #78**

941 Thanks for the comment. Since we have recalculated the trajectory, the geographical area covered  
942 by the trajectory has been changed.

943

944 **Comment #79**

945 Line 410: This is an example of how the phrasing ‘controlling the region’ needs to be rewritten to  
946 describe the transport patterns and air mass circulation.

947 **Response #79**

948 Thanks for the suggestion. We have revised the presentation and carefully revised other relevant  
949 presentations throughout the text.

950

951 **Comment #80**

952 Line 412: The cluster average does not show this and traj0 is hardly visible. Interestingly, traj1  
953 appears to have the highest concentrations of GEM and arrives from areas with high Hg emissions  
954 but is not mentioned in the text. This cluster occurs rather infrequently though. I agree the weakening  
955 of the ISM is likely the reason for the increasing pattern in GEM during the ISM3, but this should  
956 at least be mentioned.

957 **Response #80**

958 Thanks for the suggestion. We have reselected the trajectory size in the revised manuscript to avoid  
959 occlusion. There is no cluster like traj1 in the new clusters.

960

961 **Comment #81**

962 Line 419: Again, I wouldn't refer to measurements made with the Tekran systems as 'detailed'. The  
963 exact chemical identify of GOM and PBM is unknown. Therefore, I would remove this word.

964 **Response #81**

965 We have removed the words accordingly. Thanks for the suggestion.

966

967 **Comment #82**

968 Lines 418-427: In the previous paragraphs in this section, the authors examine the source regions  
969 of GEM and transport patterns during different periods. This PSCF muddles this analysis and do not  
970 provide any additional or useful information. The PSCF was applied to GEM, please indicate which  
971 species of Hg is being referred to here. The smoothing applied to these figures could be obscuring  
972 the analysis. The authors discuss depositional processes during transport affecting Hg  
973 concentrations, although this would apply to GOM and PBM and not so much GEM. In my opinion,  
974 I would omit the PSCF analysis, as it does not provide gainful information, is not described  
975 adequately in the methods section, and contradicts the previous analysis of GEM with trajectory  
976 cluster analysis. This is, however, only my opinion.

977 **Response #82**

978 Thanks for the suggestion. We agree with the reviewer that the PSCF analysis does not provide  
979 gainful information in this manuscript. We have decided to delete the PSCF related discussion.

980

981 **Comment #83**

982 Lines 429-430: I am confused by the number of factors for each period. For example, from Table 2  
983 there are only two factors that occur during the PISM (long-distance transport and local emissions).  
984 There is only one factor that is unique to a period (melt during ISM1) and only local emissions occur  
985 during all periods. Please clarify this in the text.

986 **Response #83**

987 Thanks for the comment and suggestion. As we mentioned at the beginning of section 3.4, 4-5  
988 factors were found for each period from PISM to ISM3 periods, so there were 19 factors in total.  
989 For example, in the analysis for ISM1, 5 factors were found and four of them were considered as  
990 important Hg-related components because of higher factor loadings. Two of them were assigned to  
991 local emissions. We further clarify it as follow: '**Only Hg-related components were reserved here  
992 and four underlying PCA factors are summarized (Table 2).**'

993

994 **Comment #84**

995 Table 2: The caption for Table 2 needs to be expanded. I can see that numbers in bold indicate a  
996 loading over 0.5, this needs to be stated in the caption. Why are certain species omitted from the  
997 PCA analysis for certain periods? This was not clear from the methods section. Why is there two  
998 ISM1 for local emissions? Please define VE. Would it be possible to remove the underscores from  
999 the column headers?

1000 **Response #84**

1001 Thanks for the suggestion. Table 2 lists the four underlying PCA factors for important Hg-related  
1002 components. For readability, variables with very low factor loadings (<0.1) are not shown in the  
1003 Table. As we mentioned at the beginning of section 3.4, 4-5 factors were found for each period from  
1004 PISM to ISM3, and there were 19 factors in total. In the analysis for ISM1, five factors were resolved  
1005 and four of them were considered as important Hg-related components because of high factor  
1006 loadings. Two of them were assigned to local emissions. The classification is proposed mainly based  
1007 on the distribution characteristics of the factor loadings for other meteorological conditions and  
1008 pollutant species. VE is an abbreviation of Variance Explained, we have changed it to full spelling  
1009 in the revised manuscript. In the revised manuscript, we have added a note under Table 2. **Note:**  
1010 **Variables with high factor loadings (> 0.5) were marked in bold. For readability, variables**  
1011 **with very low factor loadings (<0.1) are not presented.**

1012 The underscores from the column headers have been removed accordingly.

1013

1014 **Comment #85**

1015 Line 452: A reference is required for this statement.

1016 **Response #85**

1017 Thanks for the suggestion. We have added (Rhode et al., 2007; Xiao et al., 2015; Chen et al., 2015)  
1018 in the revised manuscript.

1019

1020 **Comment #86**

1021 Lines 453-462: While meteorology is no doubt affecting the behavior of atmospheric mercury, I am  
1022 confused about how this factor affects mercury at Nyingchi. A different Hg species are excluded  
1023 from the PCA for ISM1-3 and the only significant variable is GEM during ISM2. It is not clear from  
1024 the text how meteorology is affecting GEM during this period.

1025 **Response #86**

1026 Thanks for the comment. These factors have been assigned as meteorological factors because of  
1027 similar meteorological factor loading distributions. Different Hg species are excluded from the PCA  
1028 for ISM1-3 because of the lower factor loading rather than artificial selection.

1029

1030 **Comment #87**

1031 Lines 464-467: Please indicate which period the authors are referring to here as well as the panel in  
1032 Fig. 3. These two sentences largely say the same thing and cite the same studies, one could  
1033 reasonably combine them for brevity.

1034 **Response #87**

1035 Thanks for the suggestion. We have revised these two sentences, as follow: **'The influence of**  
1036 **increasing solar radiation may reflect the snow/ice melt process, which have been proved to**  
1037 **be able to increase atmospheric GEM concentration (Huang et al., 2010; Dommergue et al.,**  
1038 **2003).'**

1039

1040 **Comment #88**

1041 Lines 469-470: Which ‘previous simulations’? Please provide a reference. Are the authors referring  
1042 to Song et al. (2018)? If so, please cite them or combine this sentence with the previous one. Also,  
1043 the wording ‘previous simulations....during the ISM1 period’ implies that simulations were  
1044 performed for GOM during this campaign. Please rectify this.

1045 **Response #88**

1046 Thanks for the comment and suggestion. We have reorganized the sentences as follows: ‘**GEM may**  
1047 **originate from the evaporation of snow melting and/or be driven by the photoreduction of**  
1048 **snow Hg<sup>II</sup> (Song et al., 2018). The simulation indicated that the oxidation of GEM may occur**  
1049 **at the snow/ice interface in the action of solar radiation, and may lead to extra GOM release.**’

1050

1051 **Comment #89**

1052 Line 477: Please see my previous comment about the phrasing ‘generally believed’.

1053 **Response #89**

1054 Thanks for the suggestion. We have reworded it accordingly.

1055

1056 **Comment #90**

1057 Line 480: ‘masses’ instead of ‘mass’.

1058 **Response #90**

1059 We have replaced the word accordingly. Thanks for the suggestion.

1060

1061 **Comment #91**

1062 Line 497: Can the authors provide direction or recommendations for further studies?

1063 **Response #91**

1064 Thanks for the suggestion. We believe that additional wet deposition monitoring along the YZB  
1065 Grand Canyon in the future may provide more evidences on the transportation mechanisms. We  
1066 have revised the sentence, as follow: ‘**The deposited pollutants may flow into the downstream**  
1067 **area via rivers to Southeast Asia and South Asia. Additional wet deposition monitoring along**  
1068 **the YZB Grand Canyon in the future may provide more evidences on transportation**  
1069 **mechanisms.**’

1070

1071 **Comment #92**

1072 Line 502: Similar comment as the previous one.

1073 **Response #92**

1074 Thanks for the suggestion. We have revised the sentence, as follow: ‘**The high GEM concentration**  
1075 **during the PISM period may indicate that a large amount of external Hg entered the Nyingchi**  
1076 **area during the non-ISM period, and thus monitoring of isotopic atmospheric Hg in future**  
1077 **studies or accurate model simulations are needed to provide better evidences.**’

1078

1079 **Comment #93**

1080 Lines 503-511: In combination with the previous study from Qomolangma, this study provides  
1081 important insights into the transport, dynamics, and processes affecting Hg species during the PISM  
1082 and ISM. I feel that since these two studies are the first in this geographical area, there should be  
1083 more of a discussion between the differences and similarities between these two sites. The authors  
1084 mention differences but only briefly.

1085 **Response #93**

1086 Thanks for the suggestion. We have rewritten and expanded the discussion, as follow: ‘**The results**  
1087 **of our previous study on Qomolangma were different from those in Nyingchi. Qomolangma**  
1088 **site locates on the northern side of the Himalayas, a typical terrain on the southern edge of**  
1089 **the Tibetan Plateau. The Nyingchi site locates in a typical pathway for air masses to enter the**  
1090 **Tibetan Plateau. Both sites locate in sparsely populated areas, far from human activity,**  
1091 **making them ideal clean locations to study the behavior of Hg species. Hg species monitoring**  
1092 **in both sides could help explain the possible transboundary transport patterns. In terms of**  
1093 **the concentration distributions of Hg species, both sites showed low concentrations, with**  
1094 **slightly higher GEM concentrations identified at Qomolangma site. The diurnal variations in**  
1095 **the concentrations of Hg species are unique in both areas, as there are relatively little**  
1096 **anthropogenic disturbances, but Nyingchi is surrounded by greater elevation variation and**  
1097 **more complex terrain, and thus the diurnal variation is subject to more natural disturbance**  
1098 **factors. In terms of Hg species from long-range transport, Qomolangma was mainly affected**  
1099 **by monsoonal transport from India during the ISM period, showing the increases in the**  
1100 **concentrations of GEM. Nyingchi, on the contrary, has low GEM concentrations during the**  
1101 **ISM. Although receiving almost the same monsoonal influences from India, the intensity of**  
1102 **the transport and the subsidence on the transport path may be responsible for the large**  
1103 **differences in the concentrations of Hg species and their environmental behavior between the**  
1104 **two sites. Together, they represent two typical transboundary transport patterns of Hg in the**  
1105 **Tibetan Plateau.**’

1106

1107 **Comment #94**

1108 Conclusions: The Conclusions section is very similar to the Abstract. Please see my Specific  
1109 Comments from the Abstract section for suggestions and General Comments for topics that should  
1110 be **highlighted** or discussed in **greater detail**, which should be represented in a revised Conclusions  
1111 sections.

1112 **Response #94**

1113 Thanks for the suggestion. We have rewritten the Conclusions section, as follow: ‘**Comprehensive**  
1114 **Hg species monitoring was carried out in Nyingchi, a high-altitude site in the southeast of the**  
1115 **Tibetan Plateau. Nyingchi is located on the main pathway for water vapor carried by the**  
1116 **monsoon to enter the Tibet Plateau during the ISM period, which could characterize the**  
1117 **spread of pollutants from the Indian subcontinent. The concentrations of GEM and PBM**



1118 during the PISM period were significantly higher than those during the ISM period, and the  
1119 concentration of GOM during the PISM period was relatively higher than that during the  
1120 ISM period. Data from passive sampler monitoring showed that, average GEM concentrations  
1121 were the lowest in summer, with almost identical average concentrations in spring, autumn  
1122 and winter. The concentrations of Hg species in Nyingchi is particularly low, compared with  
1123 other high-altitude stations around the world. GEM concentration shows a distinct and unique  
1124 diurnal variation, with a gradual increase in GEM concentration during the day and a  
1125 maximum concentration at night. This diurnal variation may be due to the re-emission of  
1126 GEM by snowmelt and the trapping effects of pollutants by the very low planetary boundary  
1127 layer at night.

1128 According to the trajectory model, the trajectories of arrivals changed significantly with  
1129 the onset and rise of ISM. Except for winter, the vast majority of trajectories originated from  
1130 the south of the SET station, and most of the trajectories are short in distance. Through  
1131 comprehensive PCA analysis using local meteorological conditions and multiple pollutants,  
1132 long-distance transport, local emissions, meteorological factor, and snowmelt factor have been  
1133 identified to affect local Hg species concentrations. PCA analysis results also indicate that local  
1134 emission contributes between PISM and ISM3, while the long-distance transportation plays a  
1135 role during PISM and ISM3. The deposition condition and vegetation distribution in the YZB  
1136 Grand Canyon have significant influences on the transport of Hg species. The Grand Canyon  
1137 on the one hand reduces atmospheric Hg species concentrations in Nyingchi, but at the same  
1138 time poses some risks of high Hg species concentrations downstream. Our work reveals the  
1139 effect of the YZB Grand Canyon on atmospheric Hg transport, while the pathways associated  
1140 with the deposition of GOM and PBM, and the destinations of GEM should be studies in more  
1141 detail in the future. ’

1142

1143

#### 1144 **References**

1145 -

1146 Benn, D. I., and Owen, L. A. J. J. o. t. G. S.: The role of the Indian summer monsoon and the  
1147 mid-latitude westerlies in Himalayan glaciation: review and speculative discussion, 155, 353-  
1148 363, 1998.

1149 -

1150 Chen, G., Li, J., Chen, B., Wen, C., Yang, Q., Alsaedi, A., and Hayat, T.: An overview of mercury  
1151 emissions by global fuel combustion: the impact of international trade, Renewable and  
1152 Sustainable Energy Reviews, 65, 345-355, 2016.

1153 -

1154 Chen, P., Kang, S., Bai, J., Sillanpää, M., and Li, C.: Yak dung combustion aerosols in the Tibetan  
1155 Plateau: Chemical characteristics and influence on the local atmospheric environment,  
1156 Atmospheric Research, 156, 58-66, 10.1016/j.atmosres.2015.01.001, 2015.

1157 -

1158 De Simone, F., Cinnirella, S., Gencarelli, C. N., Yang, X., Hedgecock, I. M., and Pirrone, N.: Model  
1159 study of global mercury deposition from biomass burning, *Environmental science &*  
1160 *technology*, 49, 6712-6721, 2015.

1161 -

1162 De Simone, F., Cinnirella, S., Gencarelli, C. N., Carbone, F., Hedgecock, I. M., and Pirrone, N.:  
1163 Particulate-Phase Mercury Emissions during Biomass Burning and Impact on Resulting  
1164 Deposition: a Modelling Assessment, *Atmos. Chem. Phys. Discuss.*, <http://dx.doi.org/10.5194/acp-2016-685>, in review, 2016.

1165 -

1166 -

1167 Feng, L., and Zhou, T. J. J. o. G. R. A.: Water vapor transport for summer precipitation over the  
1168 Tibetan Plateau: Multidata set analysis, 117, 2012.

1169 -

1170 Fiehn, A., Quack, B., Hepach, H., Fuhlbrügge, S., Tegtmeier, S., Toohey, M., Atlas, E., Krüger, K.  
1171 J. A. C., and Physics: Delivery of halogenated very short-lived substances from the west Indian  
1172 Ocean to the stratosphere during the Asian summer monsoon, 17, 6723-6741, 2017.

1173 -

1174 Fu, X., Feng, X., Zhu, W., Wang, S., and Lu, J.: Total gaseous mercury concentrations in ambient  
1175 air in the eastern slope of Mt. Gongga, South-Eastern fringe of the Tibetan plateau, China,  
1176 *Atmospheric Environment*, 42, 970-979, 2008.

1177 -

1178 Fu, X., Feng, X., Dong, Z., Yin, R., Wang, J., Yang, Z., and Zhang, H.: Atmospheric gaseous  
1179 elemental mercury (GEM) concentrations and mercury depositions at a high-altitude  
1180 mountain peak in south China, *Atmospheric Chemistry and Physics*, 10, 2425-2437, 2010.

1181 -

1182 Fu, X., Feng, X., Liang, P., Zhang, H., Ji, J., and Liu, P.: Temporal trend and sources of speciated  
1183 atmospheric mercury at Waliguan GAW station, Northwestern China, *Atmospheric Chemistry*  
1184 *and Physics*, 12, 1951-1964, 2012.

1185 -

1186 Gay, D. A., Schmeltz, D., Prestbo, E., Olson, M., Sharac, T., and Tordon, R.: The Atmospheric  
1187 Mercury Network: measurement and initial examination of an ongoing atmospheric mercury  
1188 record across North America, *Atmospheric Chemistry and Physics*, 13, 11339-11349,  
1189 10.5194/acp-13-11339-2013, 2013.

1190 -

1191 Gong, P., Wang, X., Pokhrel, B., Wang, H., Liu, X., Liu, X., Wania, F. J. E. s., and technology:  
1192 Trans-Himalayan Transport of Organochlorine Compounds: Three-Year Observations and  
1193 Model-Based Flux Estimation, 53, 6773-6783, 2019a.

1194 -

1195 Gong, S., Hagan, D. F., and Zhang, C. J. J. o. S.: Analysis on Precipitable Water Vapor over the  
1196 Tibetan Plateau Using FengYun-3A Medium Resolution Spectral Imager Products, 2019,  
1197 2019b.

1198 -

1199 Huang, W., Chen, F., Feng, S., Chen, J., and Zhang, X. J. C. S. B.: Interannual precipitation  
1200 variations in the mid-latitude Asia and their association with large-scale atmospheric  
1201 circulation, 58, 3962-3968, 2013.

1202 -

1203 Kellerhals, M., Beauchamp, S., Belzer, W., Blanchard, P., Froude, F., Harvey, B., McDonald, K.,  
1204 Pilote, M., Poissant, L., and Puckett, K.: Temporal and spatial variability of total gaseous  
1205 mercury in Canada: results from the Canadian Atmospheric Mercury Measurement Network  
1206 (CAMNet), *Atmospheric Environment*, 37, 1003-1011, 2003.

1207 -

1208 Kondratyev, K. Y., Varotsos, C. A. J. E. S., and Research, P.: Global total ozone dynamics, 3,  
1209 153-157, 1996.

1210 -

1211 Kotlia, B. S., Singh, A. K., Joshi, L. M., and Dhaila, B. S.: Precipitation variability in the Indian  
1212 Central Himalaya during last ca. 4,000 years inferred from a speleothem record: Impact of  
1213 Indian Summer Monsoon (ISM) and Westerlies, *Quaternary International*, 371, 244-253, 2015.

1214 -

1215 Lalonde, J. D., Poulain, A. J., Amyot, M. J. E. s., and technology: The role of mercury redox  
1216 reactions in snow on snow-to-air mercury transfer, 36, 174-178, 2002.

1217 -

1218 Lalonde, J. D., Amyot, M., Doyon, M. R., and Auclair, J. C. J. J. o. G. R. A.: Photo-induced Hg (II)  
1219 reduction in snow from the remote and temperate Experimental Lakes Area (Ontario, Canada),  
1220 108, 2003.

1221 -

1222 Lin, H., Tong, Y., Yin, X., Zhang, Q., Zhang, H., Zhang, H., Long, C., Kang, S., Zhang, W., Schauer,  
1223 J. J. A. C., and Physics: First measurement of atmospheric mercury species in Qomolangma  
1224 Natural Nature Preserve, Tibetan Plateau, and evidence of transboundary pollutant invasion,  
1225 19, 1373-1391, 2019.

1226 -

1227 Liu, W., Wang, L., Chen, D., Tu, K., Ruan, C., and Hu, Z. J. C. D.: Large-scale circulation  
1228 classification and its links to observed precipitation in the eastern and central Tibetan Plateau,  
1229 46, 3481-3497, 2016.

1230 -

1231 Ping, C., and Bo, L.: Analysis of water vapor transport characteristics in southeast Tibet and its  
1232 impact, *Southern Agriculture, China*, 12, 124-125, 2018.

1233 -

1234 Rhode, D., Madsen, D. B., Brantingham, P. J., and Dargye, T.: Yaks, yak dung, and prehistoric  
1235 human habitation of the Tibetan Plateau, *Developments in Quaternary Sciences*, 9, 205-224,  
1236 2007.

1237 -

1238 Selin, N. E.: Global biogeochemical cycling of mercury: a review, *Annual Review of*  
1239 *Environment and Resources*, 34, 43-63, 2009.

1240 -

1241 Sillman, S., Marsik, F. J., Al-Wali, K. I., Keeler, G. J., and Landis, M. S. J. J. o. G. R. A.: Reactive  
1242 mercury in the troposphere: Model formation and results for Florida, the northeastern United  
1243 States, and the Atlantic Ocean, 112, 2007.

1244 -

1245 Simone, F. D., Gencarelli, C. N., Hedgecock, I. M., and Pirrone, N.: A modeling comparison of

1246 mercury deposition from current anthropogenic mercury emission inventories, *Environmental*  
1247 *science & technology*, 50, 5154-5162, 2016.

1248 -

1249 Slemr, F., Weigelt, A., Ebinghaus, R., Kock, H. H., Bödewadt, J., Brenninkmeijer, C. A., Rauthe-  
1250 Schöch, A., Weber, S., Hermann, M., and Becker, J.: Atmospheric mercury measurements  
1251 onboard the CARIBIC passenger aircraft, *Atmospheric Measurement Techniques*, 9, 2291-  
1252 2302, 2016.

1253 -

1254 Song, S., Angot, H., Selin, N. E., Gallée, H., Sprovieri, F., Pirrone, N., Helmig, D., Savarino, J.,  
1255 Magand, O., and Dommergue, A.: Understanding mercury oxidation and air-snow exchange  
1256 on the East Antarctic Plateau: a modeling study, 2018.

1257 -

1258 Sprovieri, F., Gratz, L., and Pirrone, N.: Development of a ground-based atmospheric  
1259 monitoring network for the Global Mercury Observation System (GMOS), *E3S Web of*  
1260 *Conferences*, 2013.

1261 -

1262 Sprovieri, F., Pirrone, N., Bencardino, M., D'Amore, F., Carbone, F., Cinnirella, S., Mannarino,  
1263 V., Landis, M., Ebinghaus, R., and Weigelt, A.: Atmospheric mercury concentrations observed  
1264 at ground-based monitoring sites globally distributed in the framework of the GMOS network,  
1265 *Atmospheric Chemistry and Physics*, 16, 11915-11935, 2016.

1266 -

1267 Sun, Z., Yuan, K., Hou, X., Ji, K., Li, C.-G., Wang, M., and Hou, J. J. T. H.: Centennial-scale  
1268 interplay between the Indian Summer Monsoon and the Westerlies revealed from Ngamring  
1269 Co, southern Tibetan Plateau, 30, 1163-1173, 2020.

1270 -

1271 UNEP: The Global Mercury Assessment: UN Environment Programme, Chemicals & Health  
1272 Branch, Geneva, Switzerland (2018), 2018.

1273 -

1274 UNEP, U. G. M. A.: Sources, Emissions, Releases and Environmental Transport; UNEP Chemicals  
1275 Branch: Geneva, Switzerland, 2013, There is no corresponding record for this reference, 2013.

1276 -

1277 Wang, X., Gong, P., Sheng, J., Joswiak, D. R., and Yao, T.: Long-range atmospheric transport  
1278 of particulate Polycyclic Aromatic Hydrocarbons and the incursion of aerosols to the  
1279 southeast Tibetan Plateau, *Atmospheric Environment*, 115, 124-131, 2015.

1280 -

1281 Xiao, Q., Saikawa, E., Yokelson, R. J., Chen, P., Li, C., and Kang, S.: Indoor air pollution from  
1282 burning yak dung as a household fuel in Tibet, *Atmospheric environment*, 102, 406-412, 2015.

1283 -

1284 Yan, H., Huang, J., He, Y., Liu, Y., Wang, T., and Li, J. J. o. G. R. A.: Atmospheric Water Vapor  
1285 Budget and Its Long-Term Trend Over the Tibetan Plateau, 125, e2020JD033297, 2020.

1286 -

1287 Yao, T., Masson-Delmotte, V., Gao, J., Yu, W., Yang, X., Risi, C., Sturm, C., Werner, M., Zhao,  
1288 H., and He, Y. J. R. o. G.: A review of climatic controls on  $\delta^{18}\text{O}$  in precipitation over the Tibetan  
1289 Plateau: Observations and simulations, 51, 525-548, 2013.

1290 -  
1291 Yin, X., Kang, S., Foy, B. d., Ma, Y., Tong, Y., Zhang, W., Wang, X., Zhang, G., and Zhang, Q.:  
1292 Multi-year monitoring of atmospheric total gaseous mercury at a remote high-altitude site  
1293 (Nam Co, 4730 m asl) in the inland Tibetan Plateau region, *Atmospheric Chemistry and Physics*,  
1294 18, 10557-10574, 2018.  
1295 -  
1296 Zhang, H., Fu, X., Lin, C.-J., Shang, L., Zhang, Y., Feng, X., and Lin, C.: Monsoon-facilitated  
1297 characteristics and transport of atmospheric mercury at a high-altitude background site in  
1298 southwestern China, *Atmospheric Chemistry & Physics*, 16, 2016.  
1299 -  
1300 Zhang, W., Tong, Y., Hu, D., Ou, L., and Wang, X. J. A. e.: Characterization of atmospheric  
1301 mercury concentrations along an urban–rural gradient using a newly developed passive  
1302 sampler, 47, 26-32, 2012.  
1303
